# Supplementary material
Source: PubMed Central journal article supplement (PMC2842559)
Supplement: NIHMS156577-supplement-1.pdf [file NIHMS156577-supplement-1.pdf]

## **Supplementary Information Guide**

1. Supplementary Figures 1-4, in PDF format, 4.6 MB
2. Supplementary Figures 5-9, in PDF format, 4.2 MB
3. Supplementary Figures 10-14, in PDF format, 4.3 MB
4. Supplementary Legends 1-14, in Word document, 88 KB
5. Supplementary Methods and Supplementary References, in Word document, 56 KB
