# Supplementary material
Source: PubMed Central journal article supplement (PMC2842559)

# Supplementary Figure 5

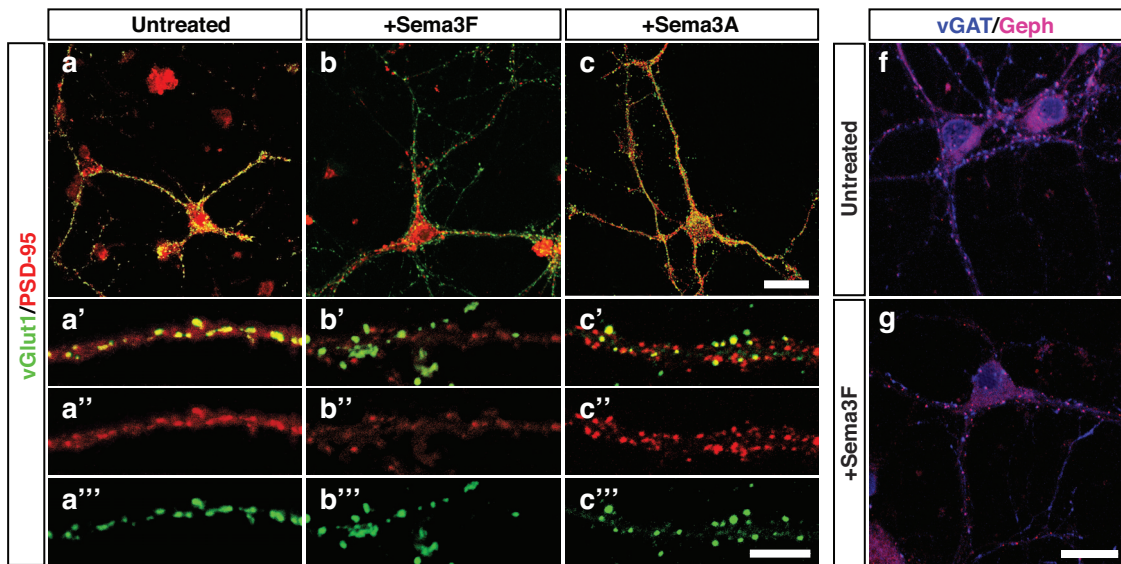

Excitatory Synapses

Inhibitory Synapses

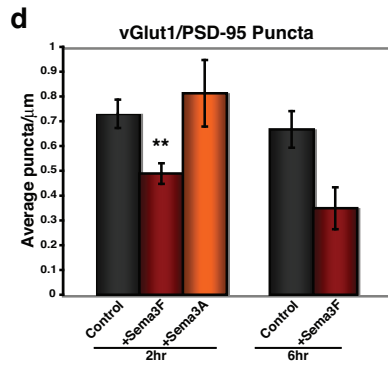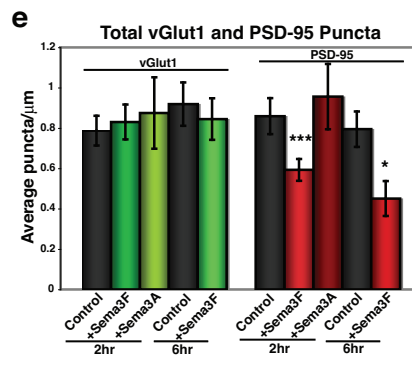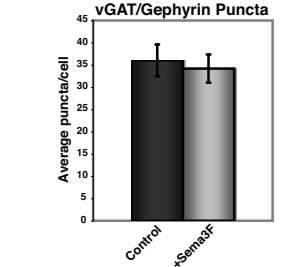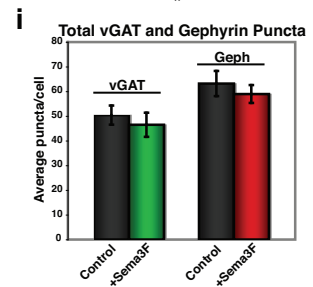

# Supplementary Figure 6

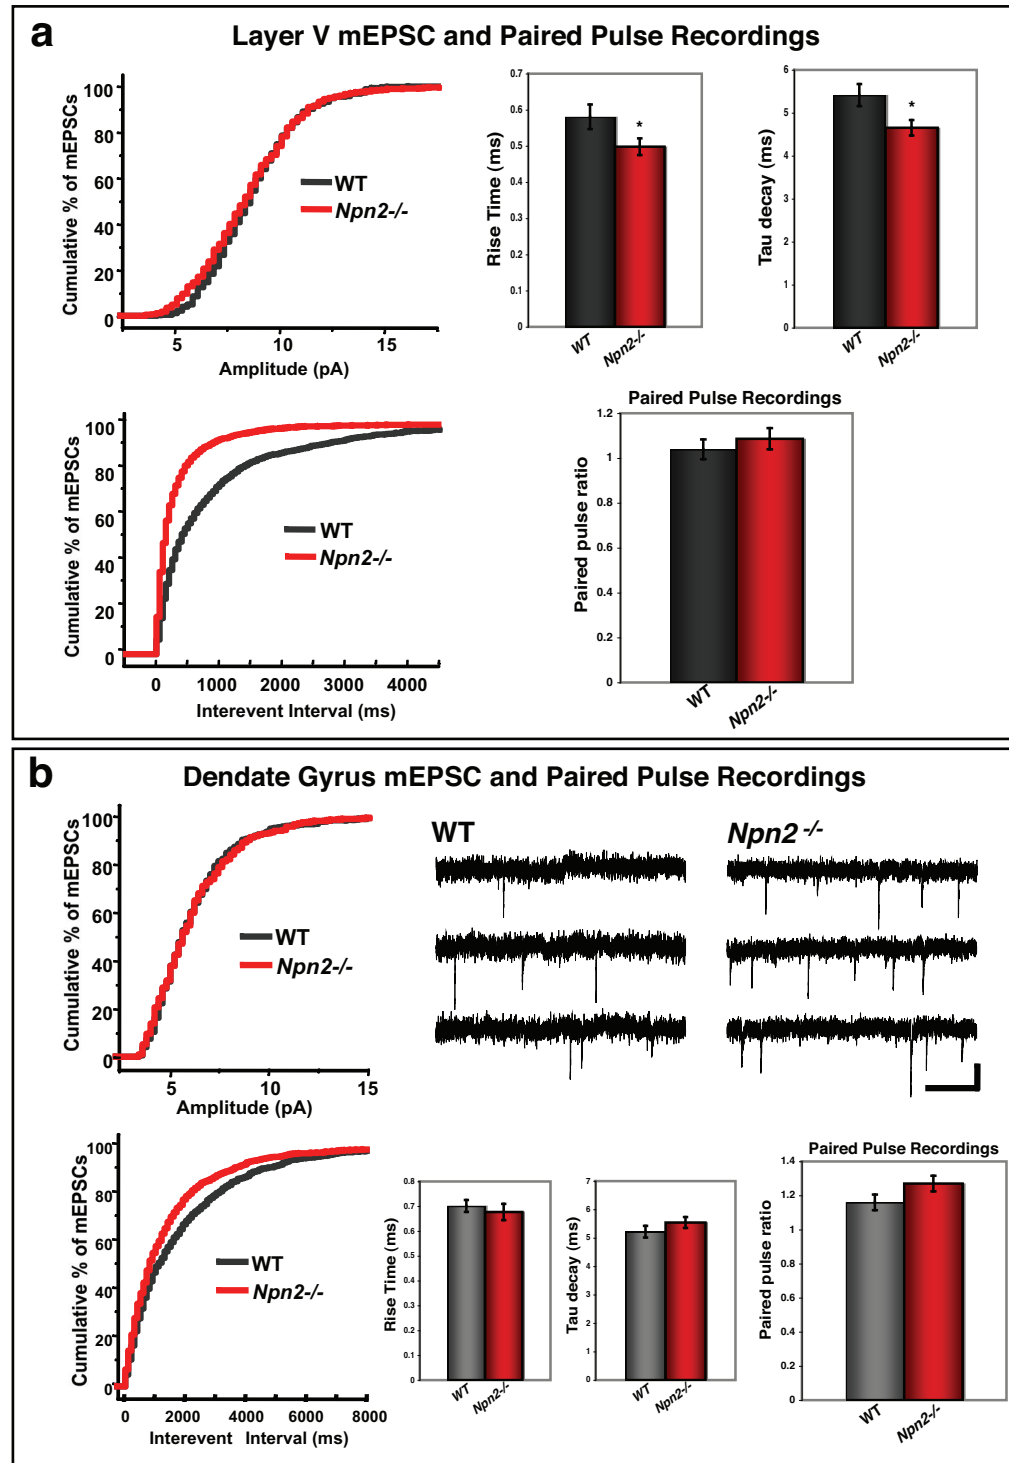

# Supplementary Figure 7

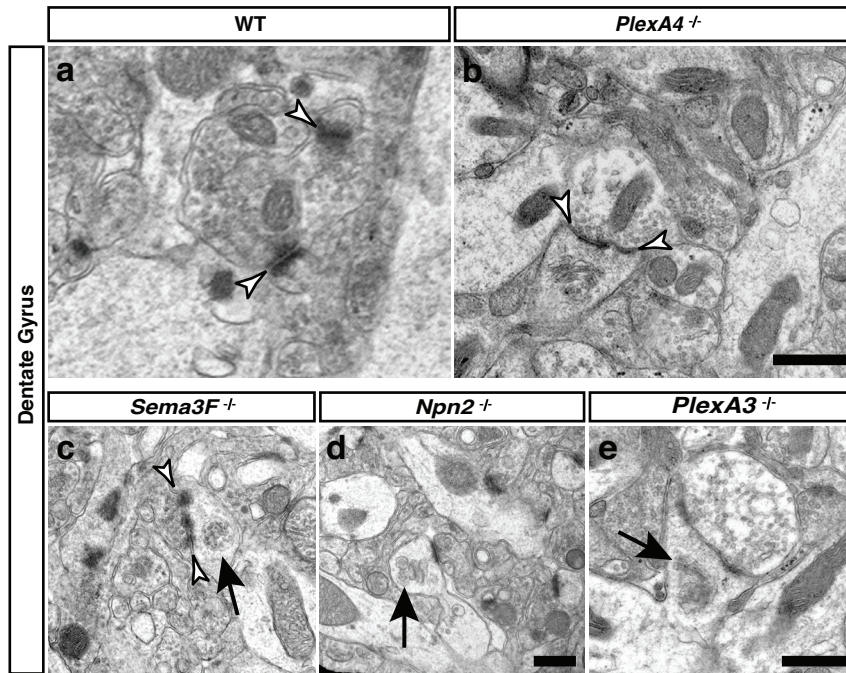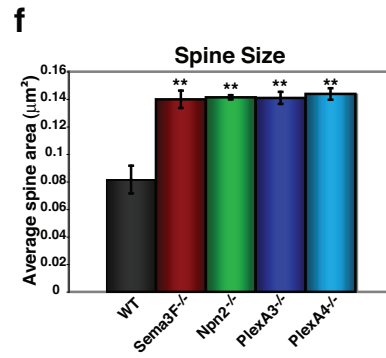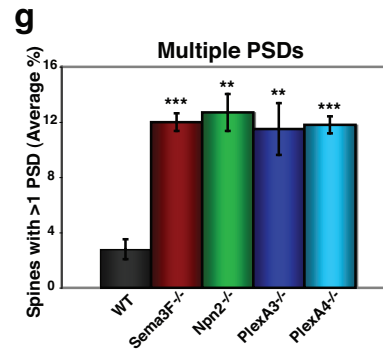

# Supplementary Figure 8

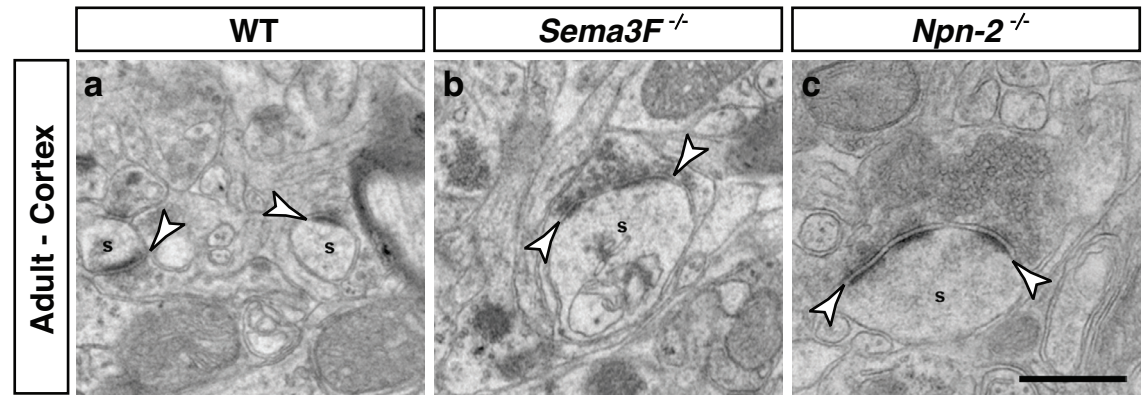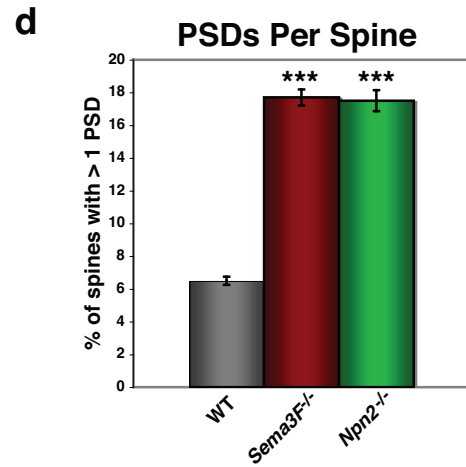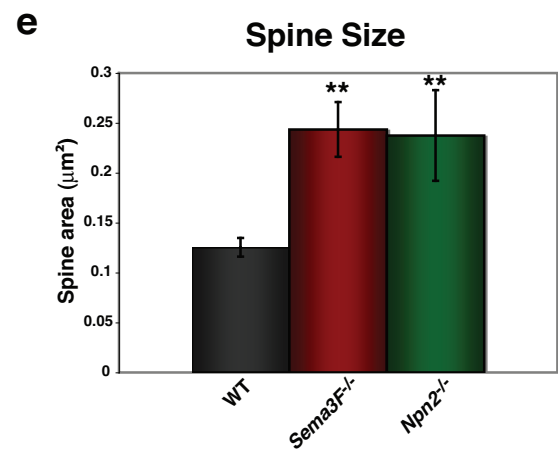

# Supplementary Figure 9

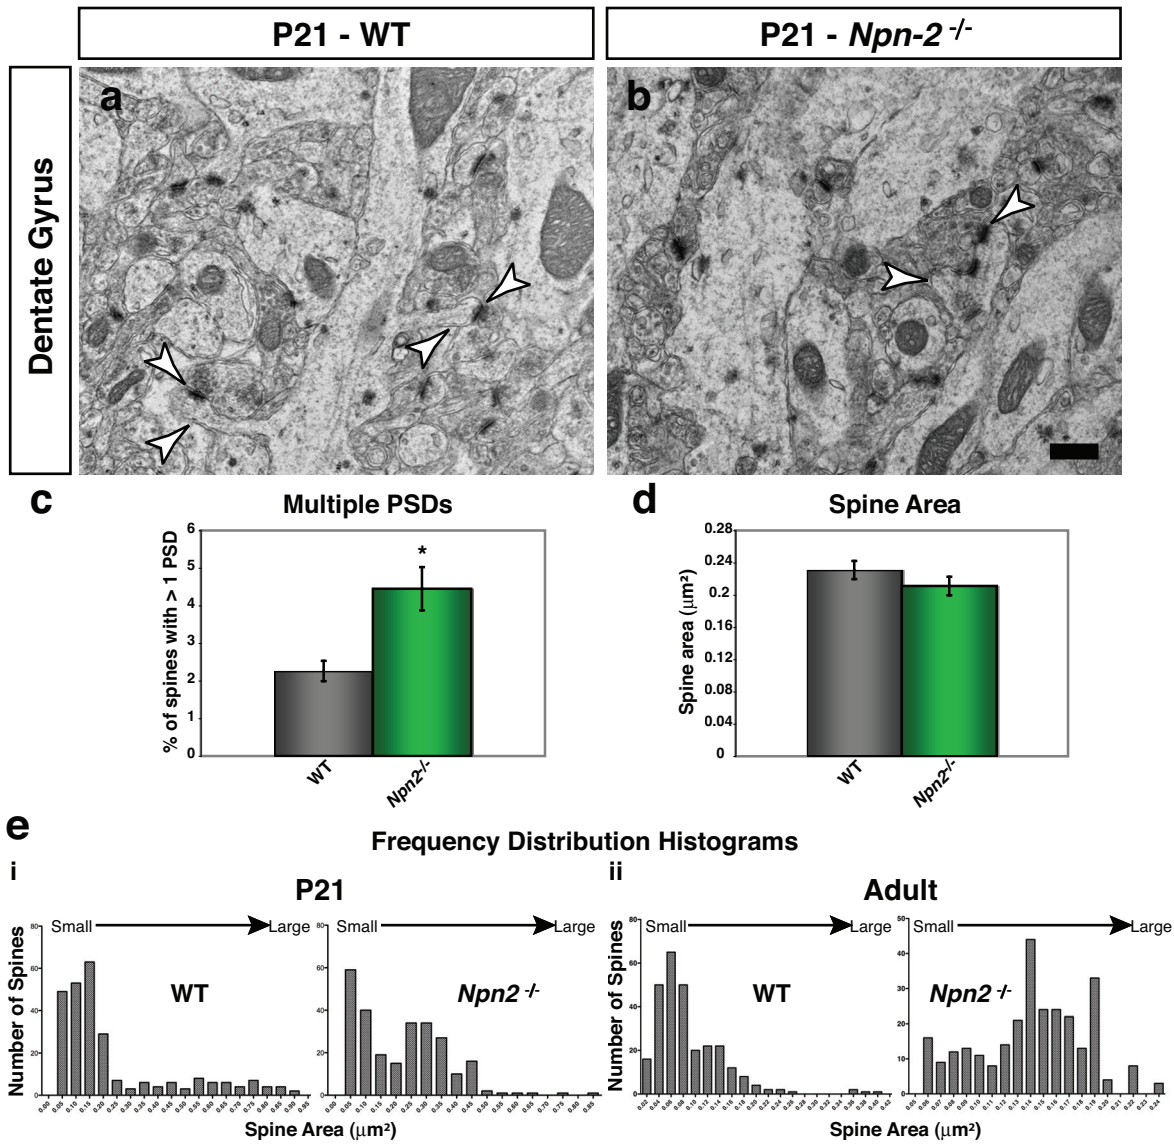

Supplement: NIHMS156577-supplement-Figs_5-9.pdf [file NIHMS156577-supplement-Figs_5-9.pdf]
