# Supplementary material
Source: PubMed Central journal article supplement (PMC2842559)

# Supplementary Figure 1

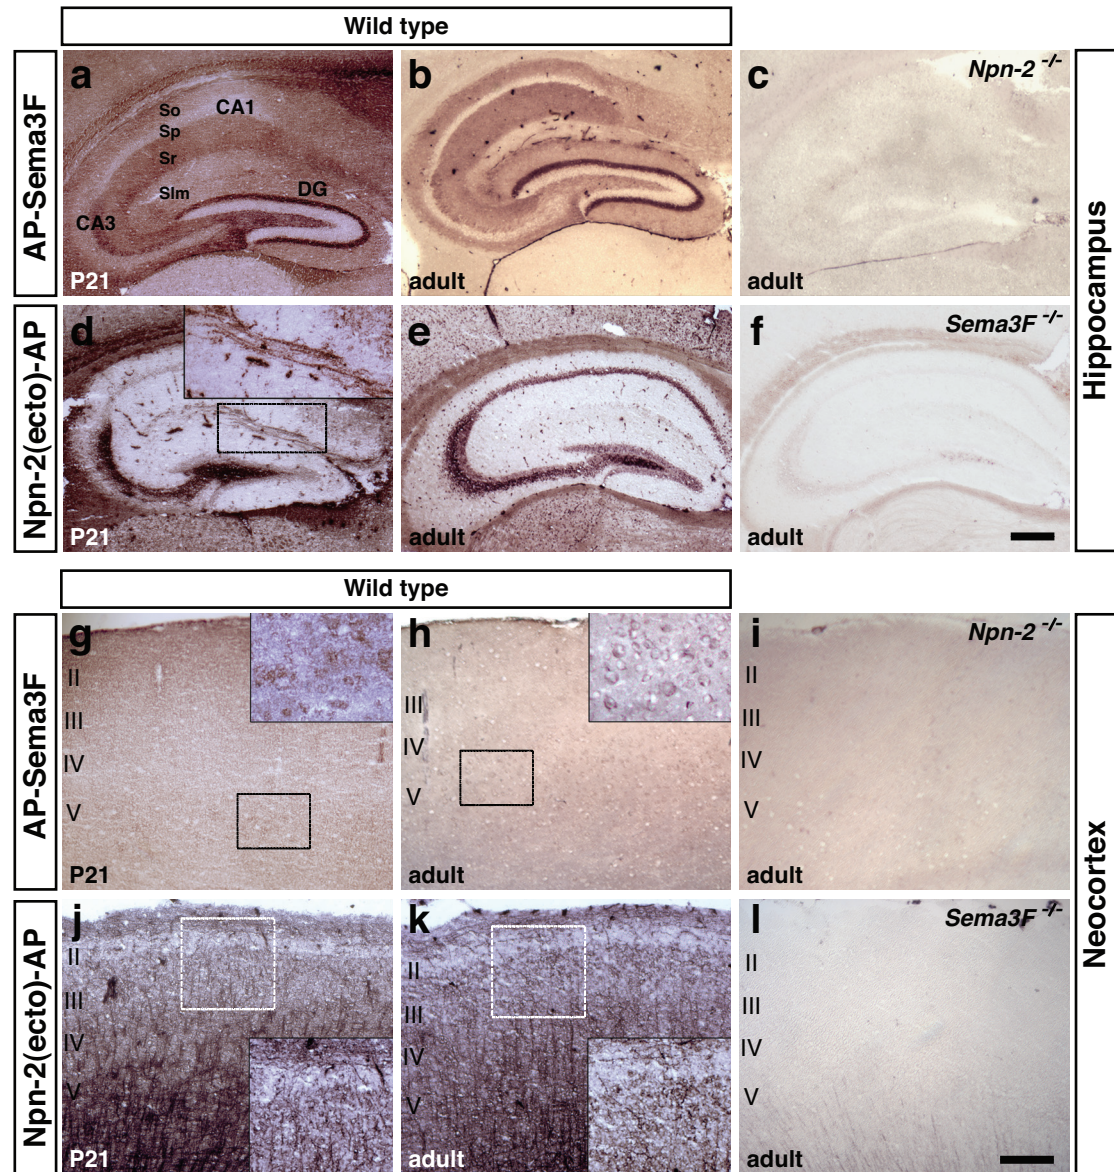

# Supplementary Figure 2

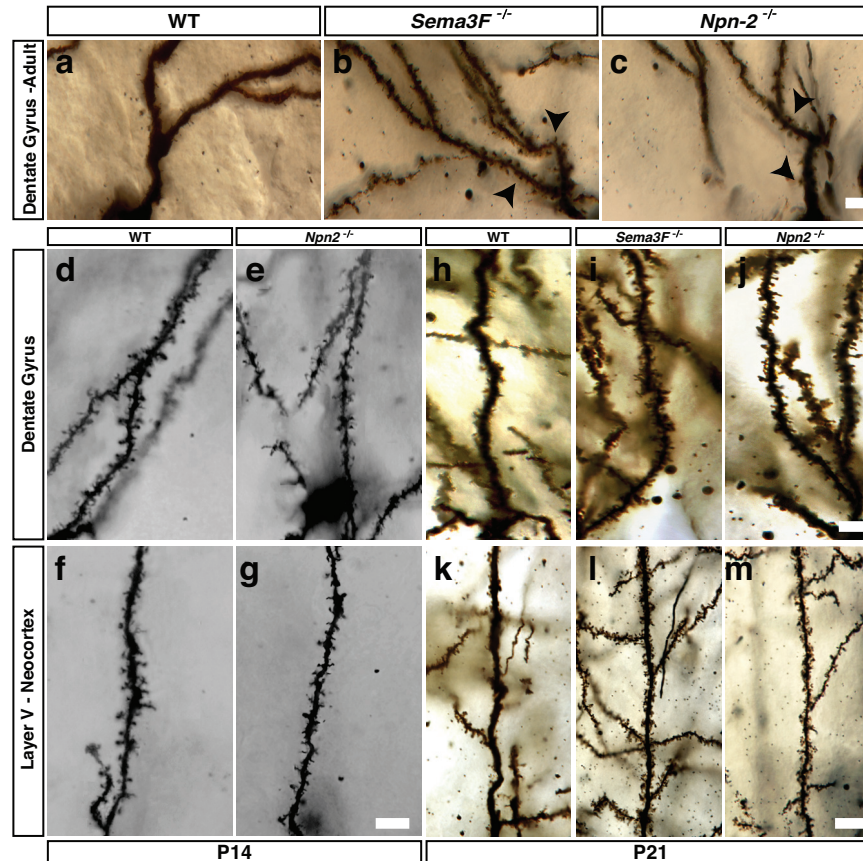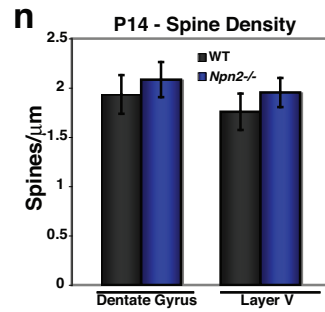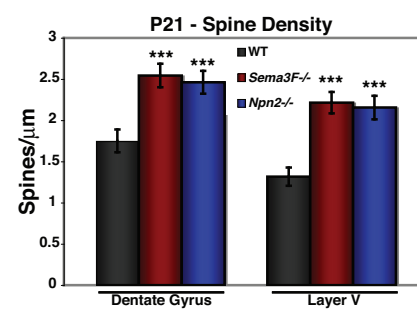

# Supplementary Figure 3

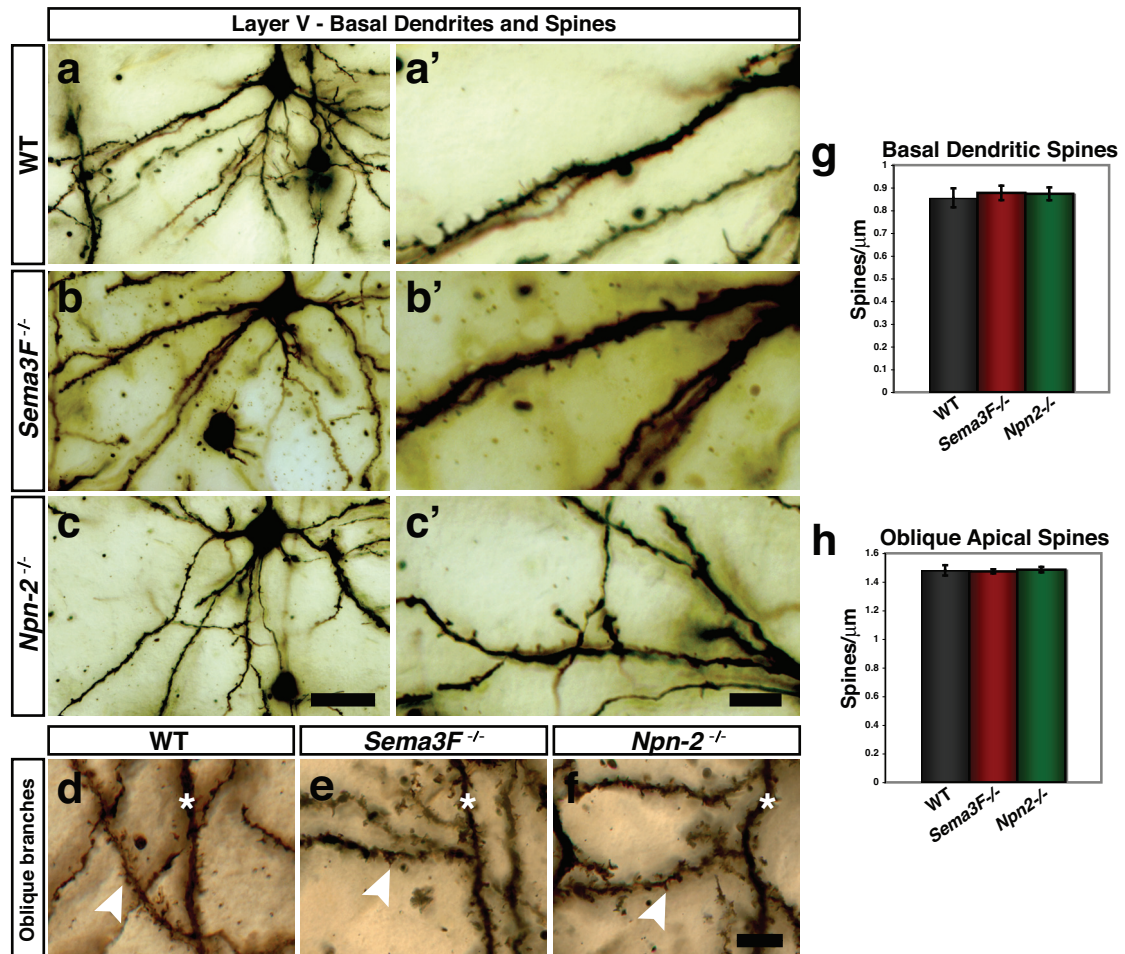

# Supplementary Figure 4

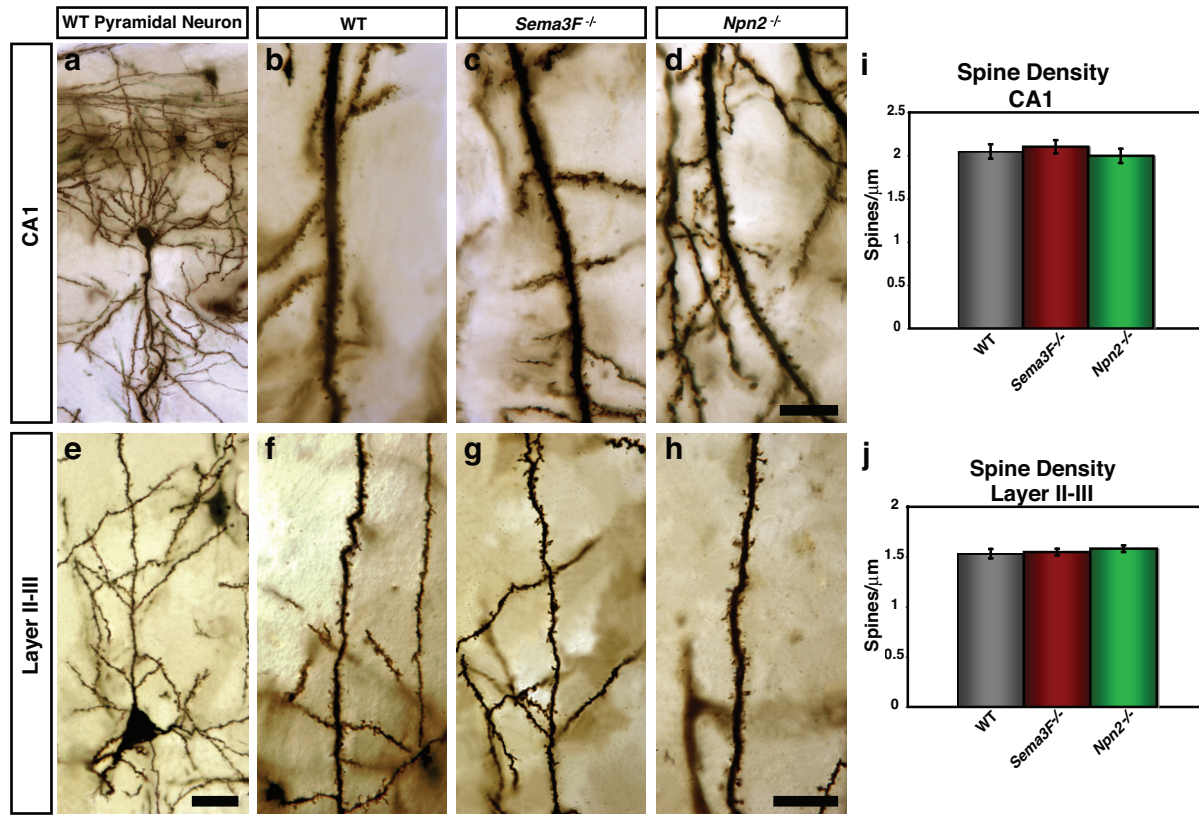

Supplement: NIHMS156577-supplement-Figs_1-4.pdf [file NIHMS156577-supplement-Figs_1-4.pdf]

# Supplementary Figure 10

**a**

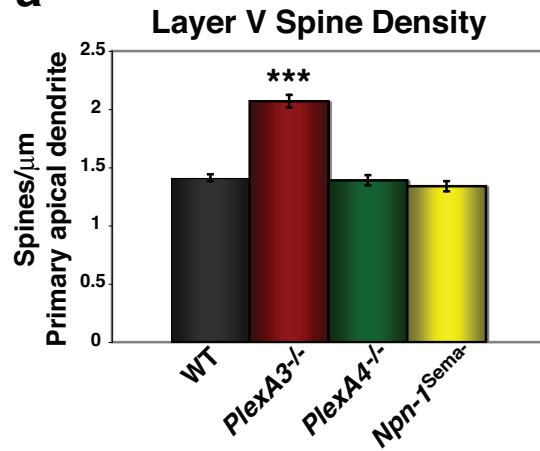

**b**

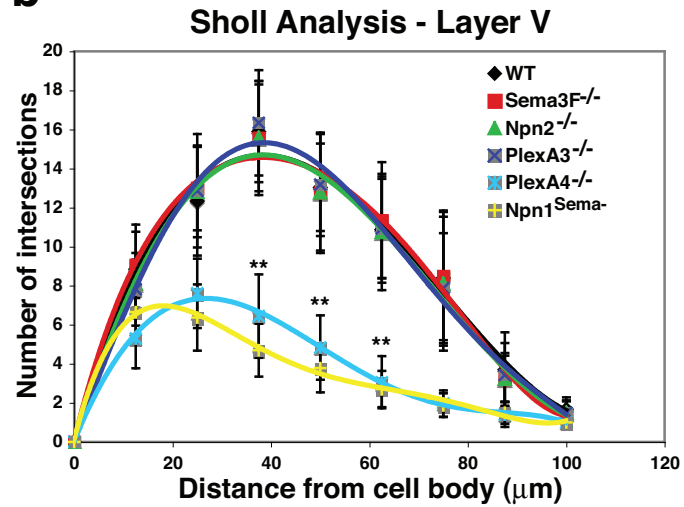

# Supplementary Figure 11

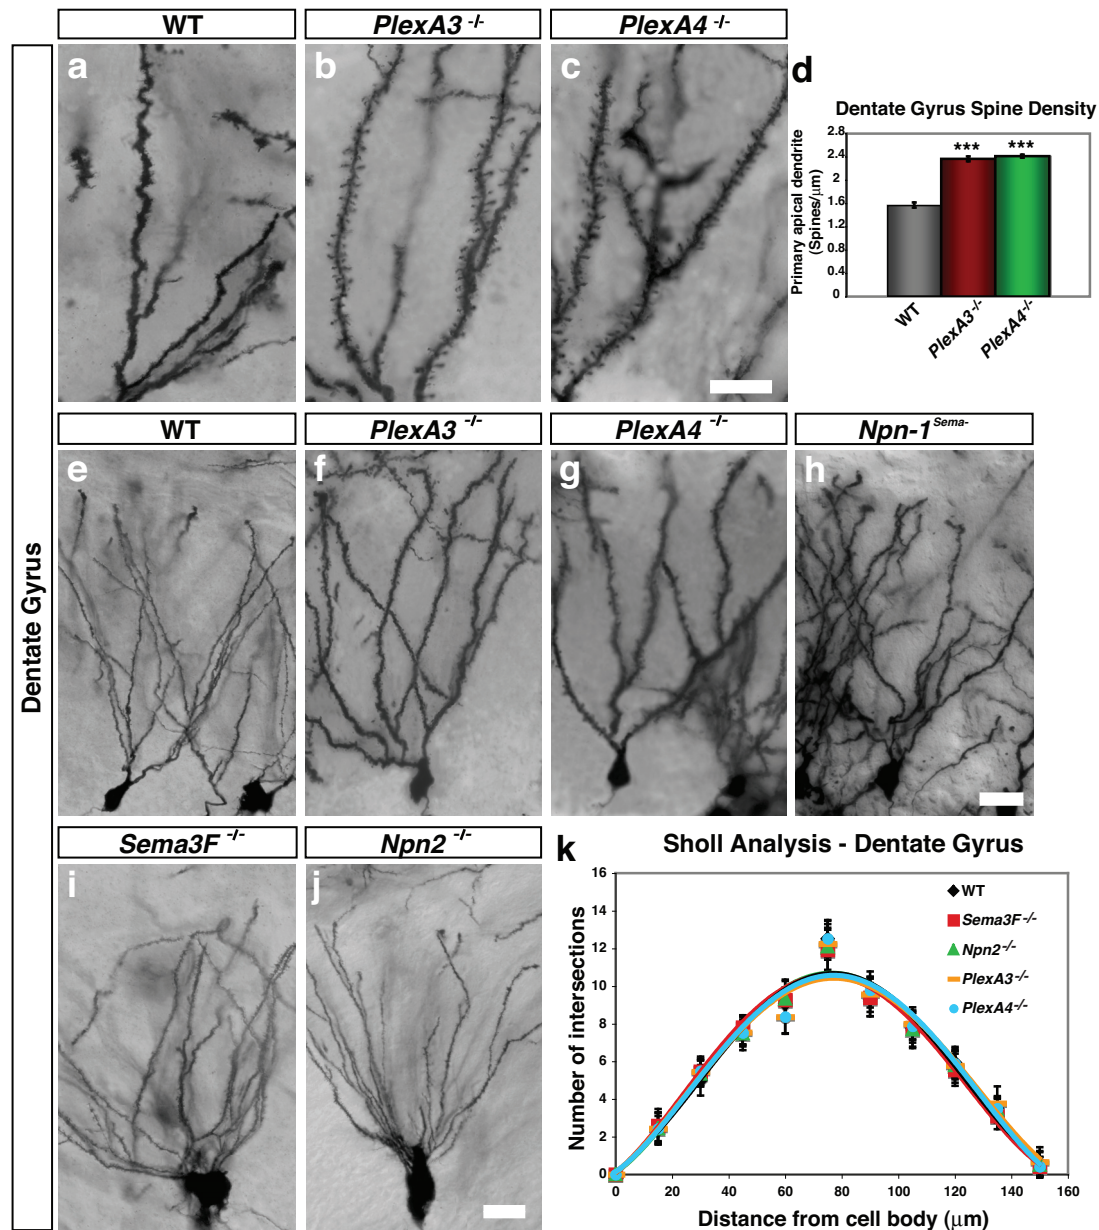



# Supplementary Figure 13

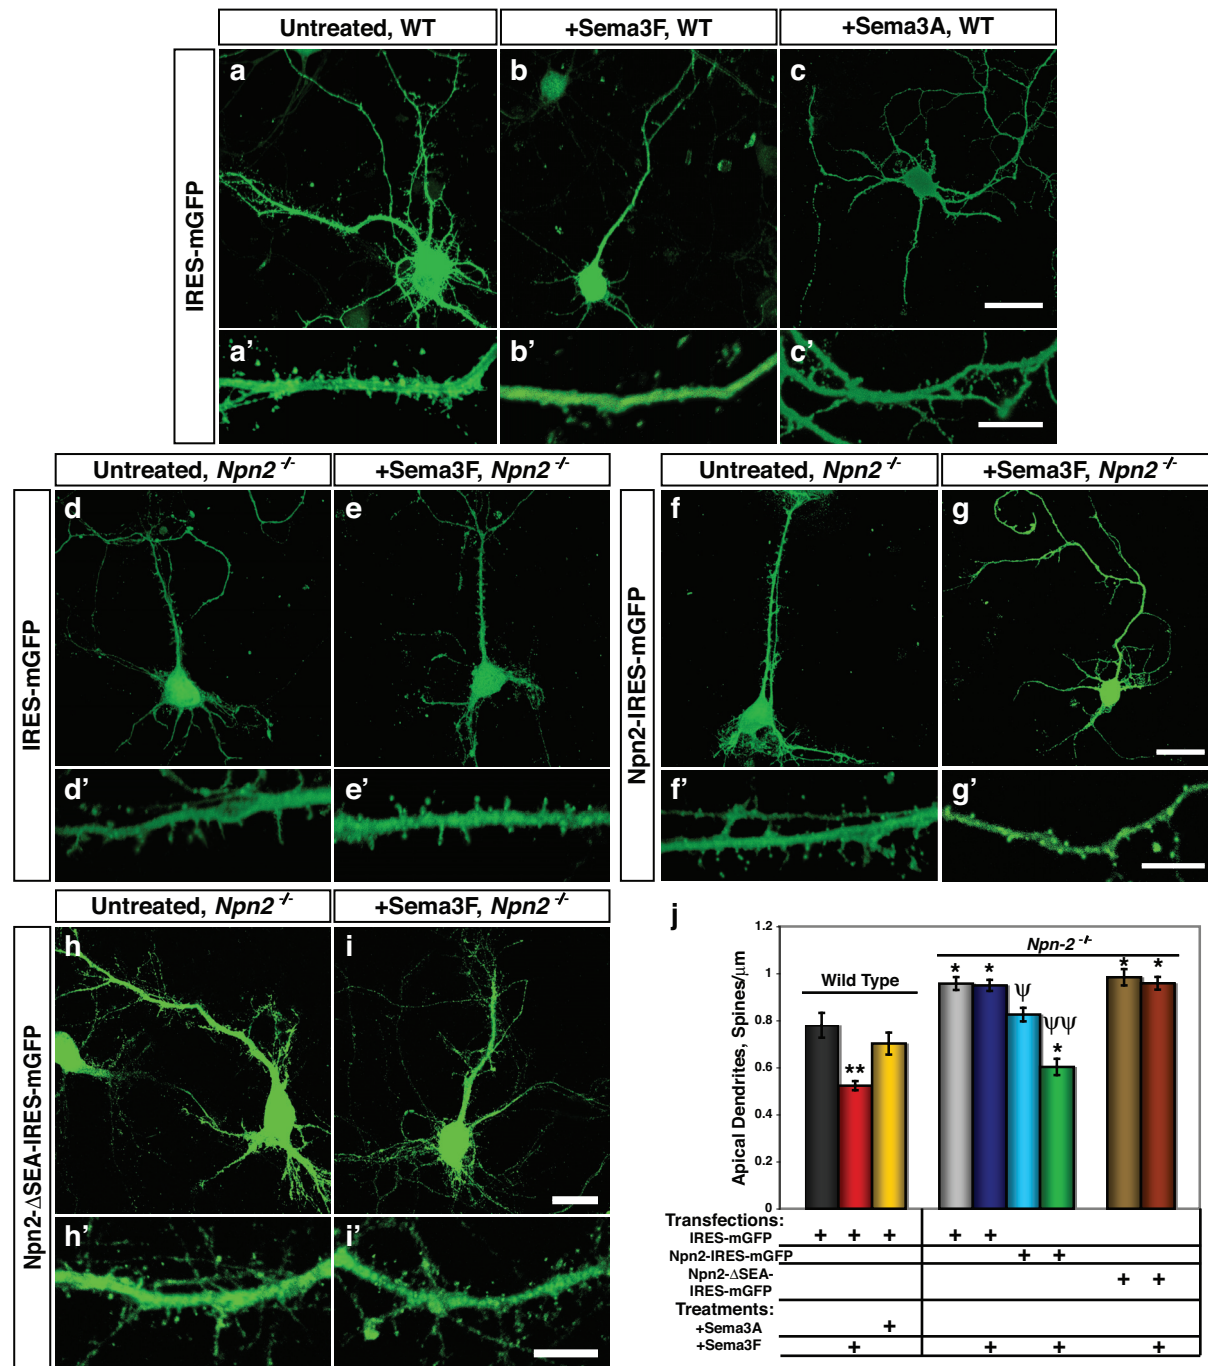



# Supplementary Figure 14

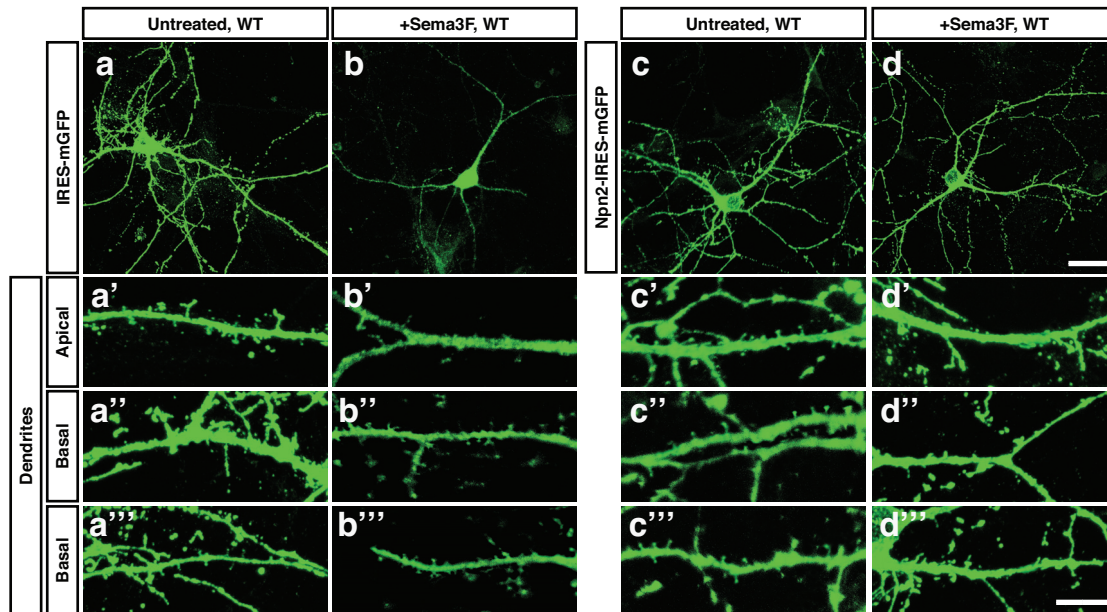

**e**

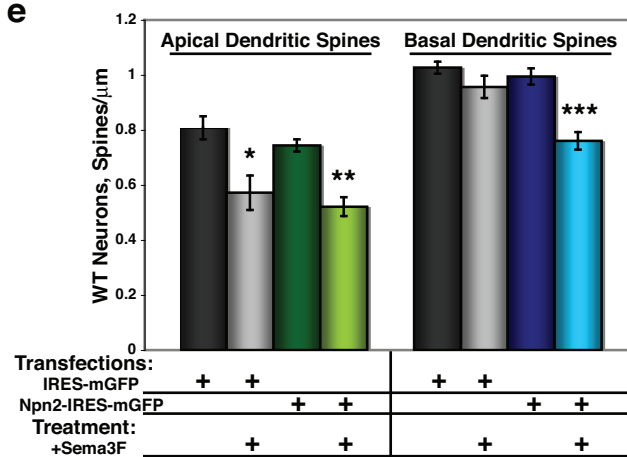

Supplement: NIHMS156577-supplement-Figs_10-14.pdf [file NIHMS156577-supplement-Figs_10-14.pdf]
